# Supplementary material for: Sequential therapy for 10 days versus triple therapy for 14 days in the eradication of Helicobacter pylori in the community and hospital populations: a randomised trial
Source: HighWire-hosted journal article supplement (doi:10.1136/gutjnl-2015-310142), 2015-09-03
Supplement: gutjnl-2015-310142supp.pdf [file gutjnl-2015-310142supp.pdf]

**Supplementary Table 1. Eradication rates in the per-protocol analysis of sequential therapy and triple therapy according to clarithromycin and metronidazole resistance-Combined analysis including the two studies**

| <b>Resistance</b>      | <b>Study</b>     | <b>S14</b>      | <b>S10</b>             | <b>T14</b>             |
|------------------------|------------------|-----------------|------------------------|------------------------|
| <b>CLA-S and MET-S</b> | Liou et al. 2013 | 99.1% (116/117) | 95.3% (123/129)        | 89.9% (98/109)         |
|                        | Present study    |                 | 95.5% (257/269)        | 96.4% (244/253)        |
|                        | <b>Combined</b>  |                 | <b>95.4% (380/398)</b> | <b>94.4% (342/362)</b> |
| <b>CLA-S and MET-R</b> | Liou et al. 2013 | 90.9% (30/33)   | 78.4% (29/37)          | 92.9% (39/42)          |
|                        | Present study    |                 | 93.5% (72/77)          | 95.6% (86/90)          |
|                        | <b>Combined</b>  |                 | <b>91.8%(101/110)</b>  | <b>94.7% (125/132)</b> |
| <b>CLA-R and MET-S</b> | Liou et al. 2013 | 71.4% (10/14)   | 70% (7/10)             | 56.3% (9/16)           |
|                        | Present study    |                 | 75% (18/24)            | 57.1% (8/14)           |
|                        | <b>Combined</b>  |                 | <b>73.5% (25/34)</b>   | <b>56.7% (17/30)</b>   |
| <b>CLA-R and MET-R</b> | Liou et al. 2013 | 0% (0/1)        | 42.9% (3/7)            | 50% (2/4)              |
|                        | Present study    |                 | 52.9% (9/17)           | 38.9% (7/18)           |
|                        | <b>Combined</b>  |                 | <b>50% (12/24)</b>     | <b>40.1% (9/22)</b>    |

S14: sequential therapy for 14 days; S10: sequential therapy for 10 days; T14: triple therapy for 14 days;

CLA-S: clarithromycin susceptible; MET-S: metronidazole susceptible; CLA-R: clarithromycin resistant;

MET-R: metronidazole resistant.
